# Supplementary material
Source: PubMed Central journal article supplement (PMC4348761)
Supplement: supp_pp.114.252700_252700supp.pdf [file supp_pp.114.252700_252700supp.pdf]

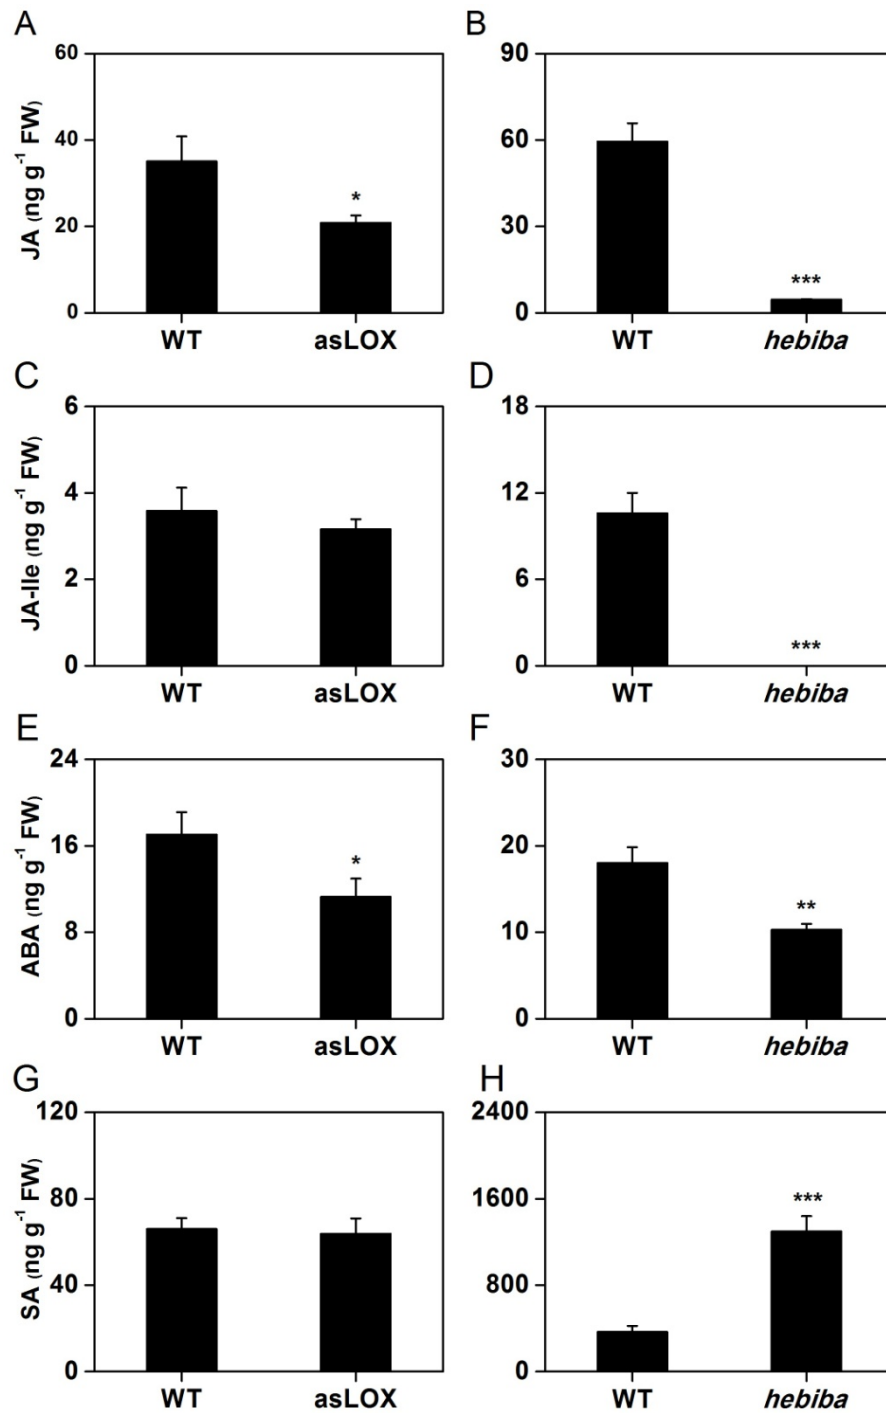

**Figure S1.** *Jasmonates regulate salicylic and abscisic acid in the roots of root herbivore attacked plants.* Phytohormone levels in wild type (WT) and jasmonate-deficient *asLOX* and *hebiba* plants are shown. Plants were infested with *Lissorhoptus oryzophilus* under flooded conditions for 20 days (+SE; n=12). Stars indicate significant differences between genotypes (p<0.05\*; p<0.01\*\*; p<0.001\*\*\*).

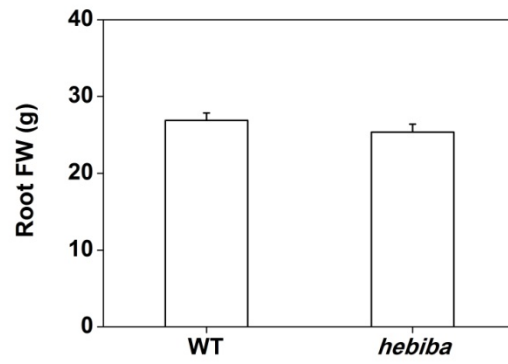

**Figure S2.** Comparison of root-biomass on wild type and JA deficient *hebiba* plants under flooded conditions. Mean values + SE are shown (n=10).

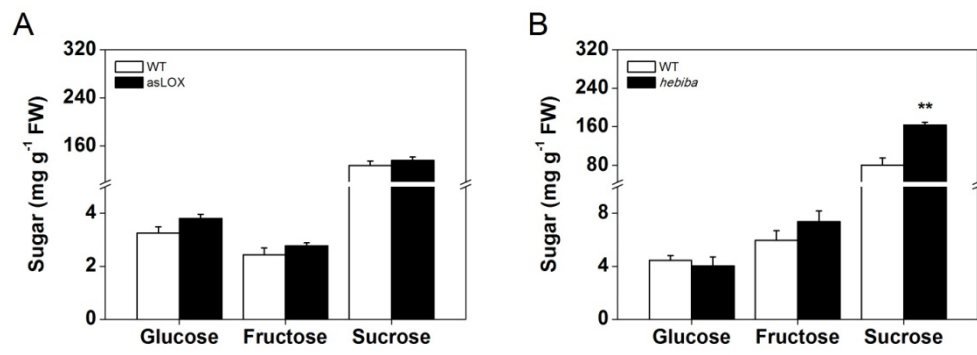

**Figure S3.** Constitutive soluble sugars in wild-type or *JA* deficient *asLOX* and *hebiba* plants under flooded conditions. Mean values + SE are shown (n=6).

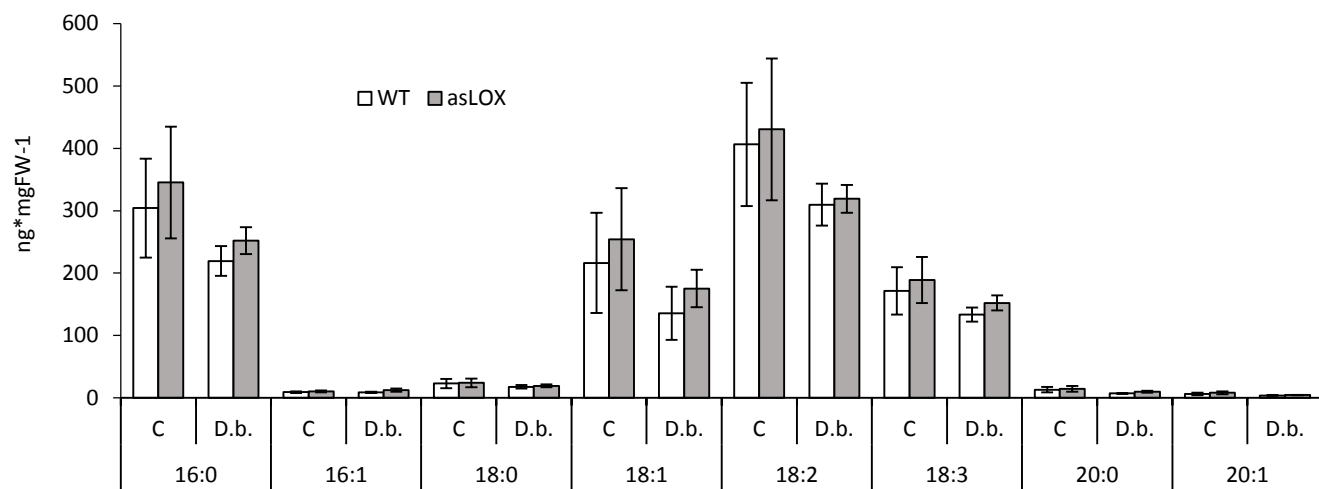

**Figure S4.** Fatty acid concentrations in control and *D. balteata* infested wild type and *asLOX* roots. Samples were analyzed 7 days post infestation ( $\pm$ SE; n=9-10). Two-Way ANOVAs did not detect any significant difference between genotypes and treatments ( $p < 0.05$ ).
